1 **Short Communication**

2 **17a-Estradiol limits the impact of ibuprofen upon community**  
3 **respiration by streambed biofilms in a sub-urban stream.**

4 Peter McClean<sup>1,2</sup>, William Ross Hunter<sup>1,2\*</sup>

5 <sup>1</sup>University of Ulster, School of Geography and Environmental Science, Coleraine,  
6 BT52 1SA, United Kingdom.

7 \*Corresponding author. Email: [w.hunter@ulster.ac.uk](mailto:w.hunter@ulster.ac.uk)

8 **Co-first author note:** <sup>1,2</sup>These authors contributed equally to this work.

9

10 **Acknowledgment**

11 This work was completed by PMcC during his final year undergraduate research  
12 project, supervised by WRH. It was funded through start-up funds provided to WRH  
13 by the University of Ulster's School of Geography and Environmental Science. We  
14 acknowledge fieldwork assistance by Ashley Williamson, and technical support in the  
15 lab from Peter Devlin and Hugo McGrogan.

16

17 **Disclaimer:** We declare no conflicts of interest relating to this study.

18

19 **Data Accessibility statement**

20 All data related to this publication are available in the supplementary information and  
21 are also archived in the University of Ulster's PURE data archive and are available  
22 under a CC-BY creative commons licence. [add web link]

23

24

25 **Running Head: Estradiol limits impact of ibuprofen upon microbial respiration**

26

27 **Title: 17 $\alpha$ -Estradiol limits the impact of ibuprofen upon community**  
28 **respiration by streambed biofilms in a sub-urban stream.**

29

30 **Abstract**

31 Pharmaceuticals compounds such as the non-steroidal anti-inflammatory drug  
32 ibuprofen and the artificial estrogen 17 $\alpha$ -estradiol are contaminants of emerging  
33 concern in freshwater systems. Globally, the use of these compounds is growing by  
34 around ~3 % per year, yet we know little about how interactions between different  
35 pharmaceuticals may affect aquatic ecosystems. Here we test how interactions  
36 between ibuprofen and 17 $\alpha$ -estradiol affect the growth and community metabolism of  
37 streambed biofilms. We used contaminant exposure experiments to quantify how  
38 these compounds affected biofilm growth (biomass), respiration and gross primary  
39 production, both individually and in combination. Within our study, we found no  
40 effects of either ibuprofen or 17 $\alpha$ -estradiol on biofilm biomass (using ash free dry  
41 mass as a proxy) or gross primary production. Ibuprofen significantly reduced biofilm  
42 respiration. However, concomitant exposure to 17 $\alpha$ -estradiol counteracted the  
43 depressive effects ibuprofen upon biofilm metabolism. Our study, thus, demonstrates  
44 that interactions between pharmaceuticals in the environment may have complex  
45 effects upon microbial contributions to aquatic ecosystem functioning.

46

47 **Key Words**

48 17 $\alpha$ -Estradiol; Biofilm; Contaminants of Emerging Concern; Ibuprofen; Microbial  
49 Metabolism; Pharmaceuticals and Personal Care products

50

51

## 52 1. Introduction

53 Human pharmaceuticals and personal care products (PPCPS) are contaminants of  
54 emerging concern within the environment [1, 2]. Since the year 2000, pharmaceutical  
55 use has grown by approximately 3% per year globally and this predicted to increase  
56 further as human populations grow [3]. Removal of Pharmaceuticals and personal  
57 care products (PPCPs) via waste-water treatment plants (WWTPs) is inefficient  
58 leading to constant release of compounds which are often specifically designed  
59 specifically to produce physiological effects within an organism, at ultra-low (nano-  
60 molar) concentrations [2, 4]; compounds such as non-steroidal anti-inflammatory  
61 drugs (NSAIDs) (e.g. ibuprofen), antimicrobial compounds (e.g. triclosan, and  
62 trimethoprim) and endocrine inhibitors (e.g. Estradiol) into the aquatic environment  
63 [4-7]. Eco-toxicological studies reveal that PPCPs at environmental concentrations  
64 can have significant physiological effects on both aquatic fauna and microorganisms,  
65 with the potential to disrupt the functioning of aquatic ecosystems, alter carbon and  
66 nutrient cycling, and negatively affect water quality [8-12].

67 Headwater and lower order streams are the smallest tributaries of a river system,  
68 which are typically closest to the rivers' sources. In these streams aquatic biofilms  
69 attached to the streambed represent the dominant mode of microbial life [13, 14].  
70 Biofilms are composed of consortia of bacteria and unicellular eukaryotic algae  
71 bound within a complex matrix of extracellular polymeric substances (EPS) and play  
72 a key role in the functioning of fluvial ecosystems, controlling both the transport and  
73 degradation of organic matter within a stream [14]. Rosi-Marshall et al. [10] revealed  
74 that aquatic PPCPs such as caffeine, cimetidine, ciprofloxacin, diphenhydramine,  
75 metformin and ranitidine and negative effects upon biofilm growth, respiration, and  
76 community composition. PPCPs, however, are diverse group of chemicals, which  
77 may interact with each other in a multitude of different, and often-unexpected ways  
78 [1, 10, 15]. Consequently, a mechanistic understanding of the interactions between  
79 different PPCPs is needed if we are to fully understand their environmental impacts.

80 Within the broad spectrum of PPCPs the non-steroidal anti-inflammatories (NSAIDs),  
81 such as ibuprofen, and endocrine disruptors, such as 17 $\alpha$ -estradiol, represent some  
82 of the most commonly detected compounds in aquatic systems [1, 4, 9]. NSAIDs are  
83 known to have antimicrobial properties, with ibuprofen exhibiting potential as a  
84 biofilm control agent [12, 16-18]. Conversely, oestrogens and other endocrine

85 disruptors may adsorb onto microbial biofilms facilitating their biological degradation  
86 [19-21]. As such, there is potential for antagonistic interactions between NSAIDs and  
87 Endocrine Disruptors to affect the growth and metabolism of streambed biofilms.  
88 Here we present the first data on how interactions between ibuprofen and 17a-  
89 estradiol affect the growth and community metabolism of streambed biofilms. We  
90 *conducted in situ* contaminant exposure experiments, following Costello et al. [22], to  
91 test how chronic exposure to ibuprofen, and 17a-estradiol, both individually and in  
92 combination, affected streambed biofilm growth, primary production and respiration.

## 93 **2. Materials and Methods**

94 All experiments were carried out between the 30<sup>th</sup> November 2018 and the 22<sup>nd</sup>  
95 January 2019 in the Ballysally Blagh (Latitude: 55°08'45.1"N Longitude:  
96 6°40'18.0"W), a ground-water fed second-order stream. The Ballysally Blagh is a  
97 tributary of the lower River Bann (Northern Ireland), draining a mixed agricultural  
98 (consisting of 21.9 % arable; 55.9 % grassland; 13.7 % heathland; 1.9 % woodland)  
99 and urban (7.3 %) catchment of 14.2 km<sup>2</sup>. The mean volumetric rate for water flow in  
100 the Ballysally Blagh is 0.21 (± 0.27) m<sup>3</sup> s<sup>-1</sup>, measured at a V-shaped weir [23] and  
101 the stream is defined as eutrophic, with dissolved nitrate concentrations ranging  
102 between 1.37 and 14.15 ml.l<sup>-1</sup> and soluble reactive phosphorus concentrations  
103 between 0.033 and 0.4 mg.l<sup>-1</sup>. Water temperature at the study site was recorded at  
104 1-hour intervals throughout the experiment using a HOBO MX2204 Bluetooth  
105 temperature logger (Fig 1). Temperatures ranged between 9.35 °C and 5.16 °C, with  
106 a mean temperature of 7.72 (± 0.85) °C recorded over the study period.

107 Contaminant exposure experiments were conducted following Costello et al. [22].  
108 Briefly, forty 120 ml screw cap sample pots were filled with 2 % agar impregnated,  
109 of which 10 were impregnated a 0.5 mmol.l<sup>-1</sup> dose of ibuprofen, 10 with a 0.5 mmol.l<sup>-1</sup>  
110 dose of 17a-estradiol, 10 with a 0.5 mmol.l<sup>-1</sup> dose of both ibuprofen and 17a-  
111 estradiol, and 10 received no pharmaceutical treatment (control). Both ibuprofen and  
112 estradiol have relatively low solubility in water (21 mg.l<sup>-1</sup> and 3.6 mg.l<sup>-1</sup> respectively).  
113 As such, stock solutions for each pharmaceutical treatment were made up in 70 %  
114 ethanol, with 1 ml aliquots used to dose each contaminant exposure experiment and  
115 the control treatments receiving a 1 ml aliquot of 70 % ethanol. Pre-combusted  
116 Whatman® 45 mm GF/F filters were placed onto of the solid agar and secured using  
117 the screw cap, to provide a substratum for streambed biofilm colonization.

118 Contaminant exposure experiments were then secured to four L-shaped metal bars  
119 (dimensions) and deployed at 10 cm depth, in an area of turbulent flow (riffle) within  
120 the stream.

121 Environmental chambers were assembled from two Curry's Essentials® C61CF13  
122 chest freezers, with the power source re-routed through Inkbird ITC-308 Digital  
123 Temperature Controller used to override the freezers internal thermostat. A single  
124 Tetra HT50 (50 Watt) aquarium heater was also attached to the Inkbird temperature  
125 controller of each unit to help stabilise the internal temperature. Two NICREW  
126 planted aquarium LED strip lights were attached to the lid, providing a source of  
127 photosynthetically active radiation ( $- 106.0 \mu\text{mol m}^{-2} \text{s}^{-1}$ , measured using an Apogee  
128 Instruments Photosynthetically Active Radiation Meter). Environmental chambers  
129 were filled with 20 l of streamwater and the internal temperatures set to 7.7 °C. The  
130 contaminant exposure experiments were left *in situ* for 54 days, after which they  
131 were recovered from the stream and placed into one of the environmental chambers  
132 and allowed to acclimate over 24 hours. During the acclimation period each  
133 mesocosm was aerated using a Aquarline Hailea Aco-9630.

134 After the acclimation period, biofilm respiration and gross primary production were  
135 determined by changes in oxygen consumption by enclosing each contaminant  
136 exposure experiment into a sealed Perspex push core (height = 30 cm, internal  
137 diameter = 7 cm) chambers containing xx l of streamwater and held at 7.7 °C in one  
138 of the environmental chambers ([24, 25]. Biofilm respiration (R) were quantified by  
139 measuring the change in oxygen concentrations over a one-hour period (oxygen  
140 consumption in darkness (PAR  $\sim 0.0 \mu\text{mol m}^{-2} \text{s}^{-1}$ ) using a Hach Sension 6 dissolved  
141 oxygen meter. Net primary production (NPP) was then quantified by measuring the  
142 change in oxygen concentration over a one 1-hour period, under artificial illumination  
143 (PAR  $\sim 106.0 \mu\text{mol m}^{-2} \text{s}^{-1}$ ). Biofilm Gross Primary Production (GPP) was calculated  
144 from NPP and R as:

145 [1] 
$$\text{GPP} = \text{NPP} - \text{R}$$

146 Microbial biomass within each Contaminant Exposure Experiment was quantified as  
147 Ash Free Dry Mass of the GF/F filters. These were dried for 48 hours at 65 °C and  
148 then subsequently combusted at 550 °C for 2 hours.

149 All data analysis was conducted in the R statistical computing environment using the  
150 *base* and *ggplot2* packages [26, 27]. We tested for independent and combined  
151 effects of ibuprofen and estradiol upon in microbial biomass (Ash Free Dry Weight),  
152 Respiration and Net Ecosystem Production using two-way analysis of variance  
153 (ANOVA). Post-hoc testing of significant interactions was conducted using Tukey's  
154 test for Honest Significant Difference. All data were visually explored, to ensure they  
155 conformed to the assumptions of normality and homoscedacity, following Zuur et al.  
156 [28]. Microbial biomass data were  $\log_{10}$  transformed to ensure the residuals of the  
157 ANOVA model conformed to a normal distribution.

### 158 **3. Results**

159 Using ash free dry mass as a proxy for microbial biomass we detected no significant  
160 effects of pharmaceutical exposure upon microbial biofilm growth (Fig 2 A;  
161 Table 1 a). We detected a significant interaction between ibuprofen and estradiol  
162 affecting microbial respiration (Fig 2 B; Table 1 b). Exposure to ibuprofen alone  
163 depressed microbial oxygen consumption by ~ 38 %, whilst exposure to estradiol  
164 alone resulted in a slight (non-significant) increase in oxygen consumption. In  
165 combination, estradiol counteracted the depressive effect of ibuprofen upon of  
166 microbial respiration. Gross Primary Production was negative in all treatments, with  
167 no significant effects of the pharmaceutical treatments detected (Fig 2 C; Table 1 c).

### 168 **4. Discussion**

169 Our study demonstrates that interactions between an NSAID (ibuprofen) and an  
170 endocrine disruptor (17 $\alpha$ -estradiol) have a significant effect upon the metabolism of  
171 streambed biofilms. Specifically, concomitant exposure to both 17 $\alpha$ -estradiol and  
172 estradiol reduces the depressive effect of ibuprofen upon biofilm respiration.  
173 Ibuprofen is known to have antimicrobial properties and has been reported to inhibit  
174 biofilm formation by both *Staphylococcus aureus* and *Escherichia coli* [16-18]. It is,  
175 therefore, unsurprising that ibuprofen depressed microbial respiration within the  
176 streambed biofilms. Estradiol has been observed to adsorb to microbial biofilms [19]  
177 where it can then be used by the resident microorganisms as an organic matter  
178 source [29, 30]. Consequently, biofilms have been proposed as a tool for the  
179 removal of estradiol and other endocrine disruptors within wastewater treatment  
180 facilities [31]. Furthermore, we propose that the sorption of estradiol to the biofilm

181 may protect the microbial cells, by reducing the space available within the EPS  
182 matrix onto which ibuprofen molecules may bind. This mechanism, however,  
183 remains speculative and would require investigation within controlled laboratory  
184 experiments.

185 Given ibuprofen's potential as a biofilm control agent [12, 16-18], we were surprised  
186 to observe that it had no effect upon biofilm biomass within our experiments. Ash  
187 free dry mass is, however, a coarse method of estimating microbial biomass and so  
188 may not be able to detect small changes in the biofilm. This is likely to be of  
189 particular concern in urban and agricultural streams, where siltation may introduce a  
190 significant bias into weight-based estimates of biomass. Visual methods, such as  
191 microscopic cell counts [32], quantification of EPS polysaccharides [32, 33] or other  
192 biomarkers, such as polar lipid fatty acids [34-37] may have provided a more  
193 accurate proxy for biomass. Thus, we cannot reliably infer whether interactions  
194 between ibuprofen and estradiol may have altered biofilm biomass within this study.

195 The negative values for GPP within the present study suggest that the biofilms were  
196 net heterotrophic, relying on the supply of organic matter from the surrounding  
197 environment to provide energy and nutrients for biofilm growth. This may reflect the  
198 choice of agar as the carrier medium for the pharmaceuticals within the contaminant  
199 exposure experiments. The agar releases a constant supply of dissolved organic  
200 matter through the glass fibre filters [10, 22], which may generate favorable  
201 microhabitat heterotrophic microorganisms. As such we were unable to determine  
202 whether chronic pharmaceutical exposure had any effects upon photosynthetic  
203 pathways within our biofilms.

204 Within this short paper we present preliminary results which demonstrate that  
205 interactions between NSAIDs and endocrine disruptors have important implications  
206 for aquatic ecosystem functioning during the winter period, when lower water  
207 temperatures limit microbial activity within streambed biofilms [38]. Overall, this  
208 suggests that PPCPs represent a major threat to ecosystem functioning in many  
209 streams and rivers. The interactions between different PPCPs, however, are  
210 potentially complex. Whilst identification of the underlying biochemical mechanisms  
211 is beyond the scope of this study, our results highlight the need for detailed  
212 ecotoxicological analysis of the multiple interactions between PPCPs and how this  
213 effects microbial and faunal activity, in the environment.

## 214 5. References

- 215 1. Gaston L, Lapworth DJ, Stuart M, Arnscheidt J. 2019. Prioritization Approaches  
216 for Substances of Emerging Concern in Groundwater: A Critical Review.  
217 *Environmental Science & Technology* 53:6107-6122.
- 218 2. Rosi-Marshall EJ, Royer TV. 2012. Pharmaceutical compounds and ecosystem  
219 function: an emerging research challenge for aquatic ecologists. *Ecosystems*.  
220 15:867-880.
- 221 3. Van Boeckel TP, Gandra S, Ashok A, Caudron Q, Grenfell BT, Levin SA,  
222 Laxminarayan R. 2014. Global antibiotic consumption 2000 to 2010: an analysis of  
223 national pharmaceutical sales data. *Lancet Infectious Diseases* 14:742-750.
- 224 4. Álvarez-Muñoz D, Rodríguez-Mozaz S, Maulvault AL, Tediosi A, Fernández-  
225 Tejedor M, Van den Heuvel F, Kotterman M, Marques A, Barceló D. 2015.  
226 Occurrence of pharmaceuticals and endocrine disrupting compounds in  
227 macroalgae, bivalves, and fish from coastal areas in Europe. *Environmental*  
228 *Research* 143:56-64.
- 229 5. Gros M, Petrović M, Barcelo D. 2007. Wastewater treatment plants as a  
230 pathway for aquatic contamination by pharmaceuticals in the Ebro river basin  
231 (northeast Spain). *Environmental Toxicology and Chemistry* 26:1553-1562.
- 232 6. Ruhí A, Acuña A, Barceló D, Huerta B, Mor J-, Rodríguez-Mozaz S, Sabater S.  
233 2016. Bioaccumulation and trophic magnification of pharmaceuticals and endocrine  
234 disruptors in a Mediterranean river food web. *Science of the Total Environment*  
235 540:250-259.



- 236 7. Archer E, Petrie B, Kasprzyk-Hordern B, Wolfaardt GM. 2017. The fate of  
237 pharmaceuticals and personal care products (PPCPs), endocrine disrupting  
238 contaminants (EDCs), metabolites and illicit drugs in a WWTW and environmental  
239 waters. *Chemosphere* 174:437-446.
- 240 8. Jobling S, Casey D, Rodgers-Gray T, Oehlmann J, Schulte-Oehlmann U,  
241 Pawlowski S, Baunbeck T, Turner AP, Tyler CR. 2003. Comparative responses of  
242 molluscs and fish to environmental estrogens and an estrogenic effluent. *Aquatic*  
243 *Toxicology* 65:205-220.
- 244 9. Hernando MD, Mezcuca M, Fernández-Alba AR, Barceló D. 2006.  
245 Environmental risk assessment of pharmaceutical residues in wastewater effluents,  
246 surface waters and sediments. *Talanta* 69:334-342.
- 247 10. Rosi-Marshall EJ, Kincaid DWL, Bechtold H, Royer TV, Rojas M, Kelly JJ.  
248 2013. Pharmaceuticals suppress algal growth and microbial respiration and alter  
249 bacterial communities in stream biofilms. *Ecological Applications* 23:583-593.
- 250 11. Drury B, Scott J, Rosi-Marshall EJK, J.J. 2013. Triclosan Exposure Increases  
251 Triclosan Resistance and Influences Taxonomic Composition of Benthic Bacterial  
252 Communities. *Environmental Science and Technology* 47:8923-8930.
- 253 12. Żur J, Piński A, Marchlewicz A, Hupert-Kocurek K, Wojcieszewska D, Guzik U.  
254 2018. Organic micropollutants paracetamol and ibuprofen: toxicity, biodegradation,  
255 and genetic background of their utilization by bacteria. *Environmental Science and*  
256 *Pollution Research* 25:21498-21524.

- 257 13. Besemer K, Peter H, Logue JB, Langenheder S, Lindstrom ES, Tranvik LJ,  
258 Battin TJ. 2012. Unraveling assembly of stream biofilm communities. *ISME Journal*  
259 6:1459-1468.
- 260 14. Battin TJ, Besemer K, Bengtsson MM, Romani AM, Packmann AI. 2016. The  
261 ecology and biogeochemistry of stream biofilms. *Nature Reviews Microbiology*  
262 14:251-263.
- 263 15. Gerbersdorf SU, Cimatoribus C, Class H, Engesser K-, Helbich S, Hollert H,  
264 Lange C, Kranert M, Metzger J, Nowak W, Seiler T-, Steger K, Steinmetz H,  
265 Wieprecht S. 2015. Anthropogenic Trace Compounds (ATCs) in aquatic  
266 habitats: Research needs on sources, fate, detection and toxicity to ensure timely  
267 elimination strategies and risk management. *Environment International* 79 79:85-  
268 105.
- 269 16. Reśliński A, Dąbrowiecki S, Głowacka K. 2015. The impact of diclofenac and  
270 ibuprofen on biofilm formation on the surface of polypropylene mesh. *Hernia* 19:179-  
271 185.
- 272 17. Shah PAL, Marshall-Batty KR, Smolen JA, Tagaev JA, Chen Q, Rodesney  
273 CA, Le HH, Gordon VD, Greenberg DE, Cannon CL. 2018. Antimicrobial Activity of  
274 Ibuprofen against Cystic Fibrosis-Associated Gram-Negative Pathogens.  
275 *Antimicrobial Agents and Chemotherapy* 62:e01574-17.
- 276 18. Oliveira IM, Borges A, Borges F, Simões M. 2019. Repurposing ibuprofen to  
277 control *Staphylococcus aureus* biofilms. *European Journal of Medicinal Chemistry*  
278 166:197-205.

- 279 19. Writer JH, Ryan JN, Keefe SH, Barb LB. 2012. Fate of 4-Nonylphenol and  
280 17 $\beta$ -Estradiol in the Redwood River of Minnesota. *Environmental Science &*  
281 *Technology* 46:860-868.
- 282 20. Zhang X, Li Y, Liu B, Wang J, Feng C. 2014. The effects of estrone and 17 $\beta$ -  
283 estradiol on microbial activity and bacterial diversity in an agricultural soil:  
284 sulfamethoxazole as a co-pollutant. *Ecotoxicology and Environmental Safety*  
285 107:313-320.
- 286 21. Adeel M, Song S, Wang Y, Francis D, Yang Y. 2017. Environmental impact of  
287 estrogens on human, animal and plant life: A critical review. *Environment*  
288 *International* 99:107-119.
- 289 22. Costello DM, Rosi-Marshall EJ, Shaw LE, Grace M, Kelly JJ. 2015. A novel  
290 method to assess effects of chemical stressors on natural biofilm structure and  
291 function. *Freshwater Biology* 61:2129-2140.
- 292 23. National River Flow Archive. 2019. Station 203050: Ballysally Blagh at  
293 University of Ulster. <https://nrfa.ceh.ac.uk/data/station/spatial/203050>.
- 294 24. Bott TL, Brock JT, Cushing CE, S. V. Gregory SV, King D, Petersen RC. 1978.  
295 A comparison of methods for measuring primary productivity and community  
296 respiration in streams. *Hydrobiologia* 60:3-12.
- 297 25. Fellows CS, Clapcott JE, Udy JW, Bunn SE, Harch BD, Smith MJ, Davies PM.  
298 2006. Benthic Metabolism as an Indicator of Stream Ecosystem Health.  
299 *Hydrobiologia* 572:71-87.

- 300 26. R Development Core Team. 2009. R: A language and environment for  
301 statistical computing.
- 302 27. Wickham H. 2016. *ggplot2: Elegant Graphics for Data Analysis*. Springer-  
303 Verlag New York.
- 304 28. Zuur AF, Ieno EN, Elphick CS. 2010. A protocol for data exploration to avoid  
305 common statistical problems. *Methods Ecology and Evolution*. 1:3-14.
- 306 29. Stumpe B, Marschner B. 2009. Factors controlling the biodegradation of 17 $\beta$ -  
307 estradiol, estrone and 17 $\alpha$ -ethinylestradiol in different natural soils. *Chemosphere*  
308 74:556-562.
- 309 30. Ribeiro AR, Carvalho MF, Afonso CMM, Tiritan ME, Castro PML. 2010.  
310 Microbial degradation of 17 $\beta$  -estradiol and 17 $\alpha$  -ethinylestradiol followed by a  
311 validated HPLC-DAD method. *Journal of Environmental Science and Health, Part B*  
312 45:265-273.
- 313 31. Pieper C, Rotard W. 2011. Investigation on the removal of natural and  
314 synthetic estrogens using biofilms in continuous flow biofilm reactors and batch  
315 experiments analysed by gas chromatography/mass spectrometry. *Water Research*  
316 45:1105-1114.
- 317 32. Grzegorzczak M, Pogorzelski SJ, Pospiech A, Boniewicz-Szmyt K. 2018.  
318 Monitoring of Marine Biofilm Formation Dynamics at Submerged Solid Surfaces With  
319 Multitechnique Sensors. *Frontiers in Marine Science* 5:363.

- 320 33. Fish K, Osborn AM, Boxall JB. 2017. Biofilm structures (EPS and bacterial  
321 communities) in drinking water distribution systems are conditioned by hydraulics  
322 and influence discolouration. *Science of The Total Environment* 593-594:571-580.
- 323 34. Middelburg JJ, Barranguet C, Boschker HTS, Herman PMJ, Moens T, Heip  
324 CHR. 2000. The fate of intertidal microphytobenthos carbon: An in situ <sup>13</sup>C-labeling  
325 study. *Limnology and Oceanography*. 45:1224-1234.
- 326 35. Frostegård A, Tunlid A, Bååth E. 2011. Use and misuse of PLFA  
327 measurements in soils. *Soil Biology and Biochemistry*. 43:1621-1625.
- 328 36. Hunter WR, Veuger B, Witte U. 2012. Macrofauna regulate heterotrophic  
329 bacterial carbon and nitrogen incorporation in low-oxygen sediments. *ISME Journal*  
330 6:2140-2151.
- 331 37. Hunter WR, Jamieson A, Huvenne VAI, Witte U. 2013. Sediment community  
332 responses to marine vs. terrigenous organic matter in a submarine canyon.  
333 *Biogeosciences*. 10:67-80.
- 334 38. Ylla I, Romaní AM, Sebater S. 2012. Labile and Recalcitrant Organic Matter  
335 Utilization by River Biofilm Under Increasing Water Temperature. *Microbial Ecology*  
336 64:593-604.

337

338

339

340

341

342 **Table**

343 Table 1. ANOVA summary tables of the effects of Ibuprofen and 17 $\alpha$ -Estradiol upon  
344 a) biomass (ash free dry weight), b) respiration and c) Gross Primary Production of  
345 cultured streambed biofilms.  
346

| a) Biomass (Ash Free Dry Weight) |    |       |         |       |          |
|----------------------------------|----|-------|---------|-------|----------|
|                                  | Df | SS    | MS      | F     | <i>p</i> |
| Ibuprofen                        | 1  | 0.001 | 0.00086 | 0.008 | 0.931    |
| Estradiol                        | 1  | 0.006 | 0.00586 | 0.051 | 0.822    |
| Ibuprofen : Estradiol            | 1  | 0.151 | 0.15142 | 1.331 | 0.256    |
| Residuals                        | 36 | 4.097 | 0.11379 |       |          |

  

| b) Respiration        |    |      |      |       |                  |
|-----------------------|----|------|------|-------|------------------|
|                       | Df | SS   | MS   | F     | <i>p</i>         |
| Ibuprofen             | 1  | 6482 | 6482 | 41.13 | <b>&lt;0.001</b> |
| Estradiol             | 1  | 5085 | 5085 | 32.26 | <b>&lt;0.001</b> |
| Ibuprofen : Estradiol | 1  | 2952 | 2952 | 18.73 | <b>&lt;0.001</b> |
| Residuals             | 36 | 5674 | 158  |       |                  |

  

| c) Gross Primary Production |    |       |        |       |          |
|-----------------------------|----|-------|--------|-------|----------|
|                             | Df | SS    | MS     | F     | <i>p</i> |
| Ibuprofen                   | 1  | 40    | 40.4   | 0.037 | 0.848    |
| Estradiol                   | 1  | 2612  | 2611.7 | 2.403 | 0.130    |
| Ibuprofen : Estradiol       | 1  | 2318  | 2318.1 | 2.133 | 0.153    |
| Residuals                   | 36 | 39121 | 1086.7 |       |          |

347

348 **Figures**

349 Figure 1. Change in water temperature over the biofilm growth period, measured at 1  
350 hour intervals using a HOBO MX2204 Bluetooth temperature logger

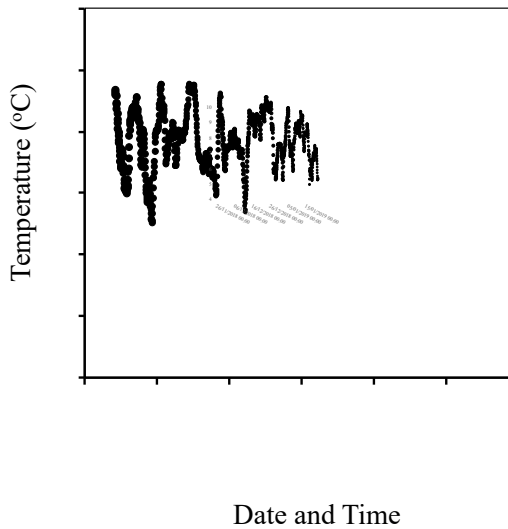

351

352

353 Figure 2. Effects of Ibuprofen (♂) and Estradiol (♀) upon the (A) biomass (ash free  
354 dry weight), (B) respiration and (C) Gross Primary Production of cultured streambed  
355 biofilms. Significance levels: \*\*\* $p < 0.001$ ; \*\* $p < 0.01$ ; \* $p < 0.05$ ; N/S  $p > 0.05$ . Where  
356 significant interactions were identified, groups labelled with the same lowercase  
357 letter are not significantly different ( $p > 0.05$ ; Tukey's tests).

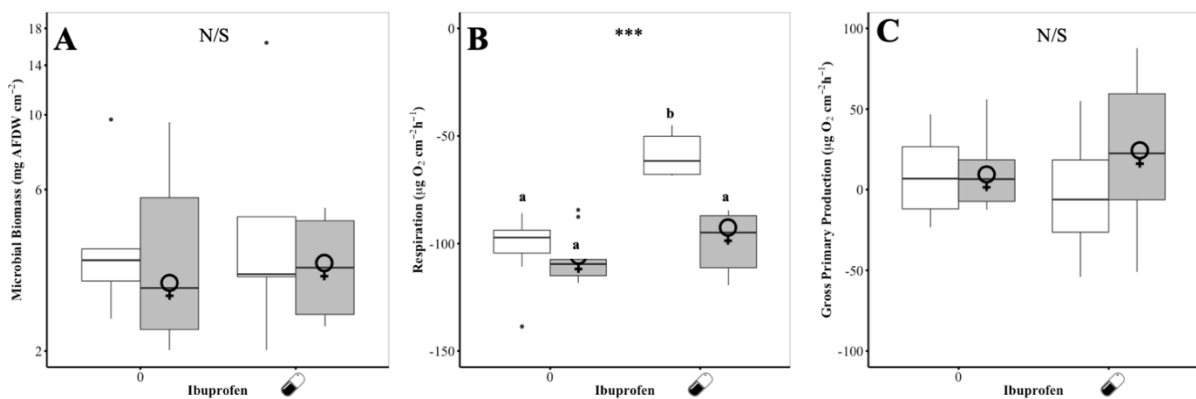

358
